# Supplementary material for: Leukocyte inflammatory phenotype and function in migraine patients compared with matched non-migraine volunteers: A pilot study
Source: Research Square preprint supplement (doi:10.21203/rs.3.rs-1239297/v1), 2022-01-28
Supplement: Supplementary file 1 [file c011673248b721ef85431ff9.docx]

**Appendix table. Migraine, headache (HA), pain information and overuse of pain medication**

| **Study ID** | **Number of HA per 30 days** | **Number of migraines per 30 days** | **Comorbid pain** | **Aura** | **Meets chronic migraine criteria** | **Percent of days with HA (A)** | **Percent of days with Migraine (B)** | **Percent of headaches that are migraines (A/B)** | **Meets criteria for overuse of any pain medication** | **Triptan overuse** | **NSAID /ASA overuse** | **Overuse of opioids** | **Overuse multiple drug classes** |
| --- | --- | --- | --- | --- | --- | --- | --- | --- | --- | --- | --- | --- | --- |
| M1133 | 9 | 9 | TMJ | 1 | 0 | 31% | 29% | 91% | **0** | 0 | 0 | 0 | 0 |
| M1139 | 26 | 20 | None | 1 | 1 | 87% | 65% | 75% | **1** | 0 | 1 | 0 | 1 |
| M1140 | 30 | 19 | IBS | 0 | 1 | 100% | 62% | 62% | **0** | 0 | 0 | 0 | 0 |
| M1142 | 30 | 20 | Fibromyalgia | 0 | 1 | 100% | 68% | 68% | **1** | 0 | 0 | 0 | 1 |
| M1143 | 30 | 20 | Fibromyalgia | 0 | 1 | 100% | 68% | 68% | **0** | 0 | 0 | 0 | 0 |
| M1144 | 17 | 7 | IBS | 0 | 0 | 57% | 22% | 38% | **0** | 0 | 0 | 0 | 0 |
| M1145 | 24 | 9 | Back pain | 0 | 1 | 81% | 29% | 35% | **1** | 0 | 0 | 1 | 1 |
| M1149 | 10 | 6 | None | 0 | 0 | 34% | 21% | 60% | **1** | 0 | 0 | 0 | 1 |
| M1152 | 9 | 6 | None | 1 | 0 | 29% | 20% | 70% | **0** | 0 | 0 | 0 | 0 |
| M1153 | 19 | 12 | None | 0 | 1 | 64% | 41% | 64% | **1** | 0 | 0 | 0 | 1 |
| M1154 | 17 | 6 | Arthritis | 1 | 0 | 55% | 21% | 38% | **1** | 0 | 0 | 0 | 1 |
| M1155 | 16 | 8 | Back pain | 0 | 1 | 52% | 28% | 54% | **0** | 0 | 0 | 0 | 0 |
| M1156 | 13 | 5 | None | 0 | 0 | 43% | 18% | 42% | **1** | 0 | 0 | 0 | 1 |
| M1158 | 12 | 11 | Arthritis | 0 | 0 | 41% | 38% | 92% | **1** | 0 | 0 | 0 | 1 |
| M1159 | 16 | 10 | None | 1 | 1 | 55% | 32% | 58% | **0** | 0 | 0 | 0 | 0 |
| Mean | 18.6 | 11.2 | Sum | 5 | 8 |  |  |  | 8 |  |  |  |  |
| SD | 7.7 | 5.7 | Percent | 33% | 53% |  |  |  | 53% |  |  |  |  |
| **Definition of chronic migraine: Headache occurring on 15 or more days/month for more than 3 months, which, on at least 8 days/month,** | | | | | | | | | | | | |  |  |  |  |
| **has the features of migraine headache.** | | | |  |  |  |  |  |  |  |  |  |  |
